# Supplementary material for: Electrocatalytic properties of a vertically oriented graphene film and its application as a catalytic counter electrode for dye-sensitized solar cells
Source: Royal Society of Chemistry journal article supplement (doi:10.1039/c4ta02028f), 2014-01-01
Supplement: c4ta02028f1.pdf [file c4ta02028f1.pdf]

## Supplementary Information

Xuan Pan<sup>1</sup>, Kai Zhu<sup>2\*</sup>, Guofeng Ren<sup>1</sup>, Nazifah Islam<sup>1</sup>, Juliusz Warzywoda<sup>3</sup>, Zhaoyang Fan<sup>1\*</sup>

<sup>1</sup>Department of Electrical and Computer Engineering and Nano Tech Center, Texas Tech University, Lubbock, Texas, 79409, USA

<sup>2</sup>Chemical and Materials Science Center, National Renewable Energy Laboratory, Golden, Colorado 80401, USA

<sup>3</sup>Materials Characterization Center, Whitacre College of Engineering, Texas Tech University, Lubbock, Texas, 79409, USA

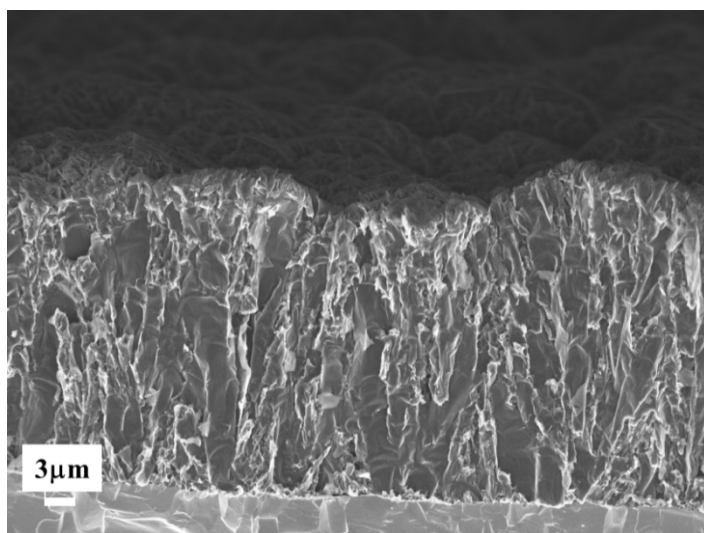

Figure S1. A representative cross-sectional SEM view of VOG (S3), indicating a thickness of ~30 μm.

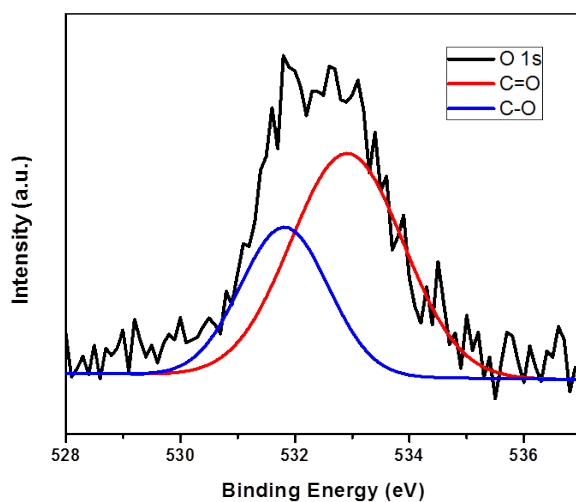

Figure S2. XPS spectrum of O 1s peak that can be fitted with C-O bond at 531.8 eV and C=O bond at 532.9 eV.

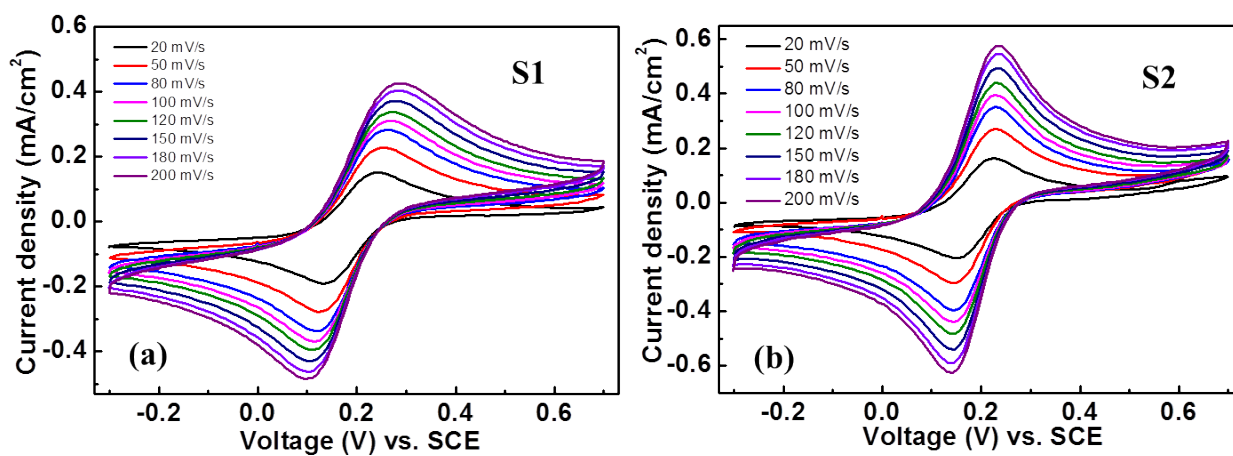

Fig. S3. The C-V profiles of samples S1 and S2 at different scan rates from 20 to 200 mV/s for  $\text{Fe}(\text{CN})_6^{3-/4-}$  redox couple.

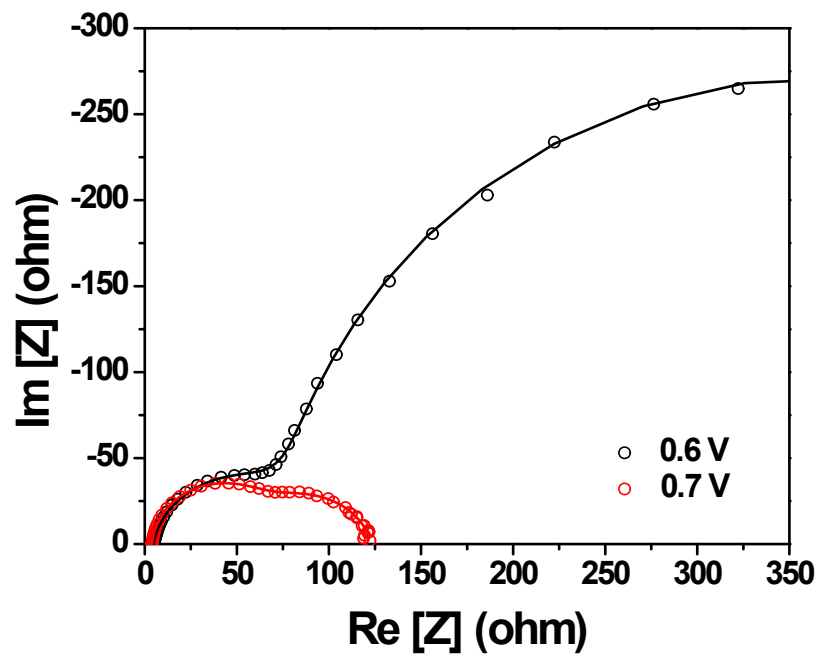

Figure S4. Typical Nyquist plots of the impedance responses for a dye-sensitized solar cell using VOG counter electrode measured at two different bias voltages.
